# Supplementary material for: Growing 3D ZnO nano-crystals on 1D SiC nanowires: enhancement of dielectric properties and excellent electromagnetic absorption performance
Source: Royal Society of Chemistry journal article supplement (doi:10.1039/c6tc03162e), 2016-01-01
Supplement: c6tc03162e1.pdf [file c6tc03162e1.pdf]

## Electronic Supplementary Information

(ESI)

Growing 3D ZnO nano-crystals on 1D SiC nanowires: A facile synthesis and excellent electromagnetic absorption performance

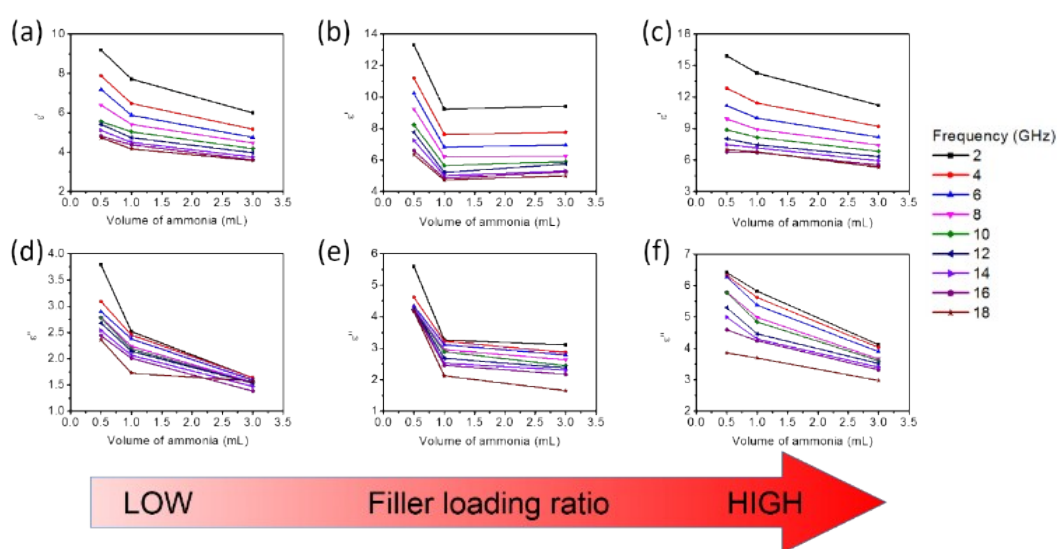

Fig. S1 Comparing the relative complex permittivity of as-fabricated three samples under the filler loading ratio of 20.0 wt% (a, d), 30.0 wt% (b, e) and 40 wt% (c, f) in wax composites.

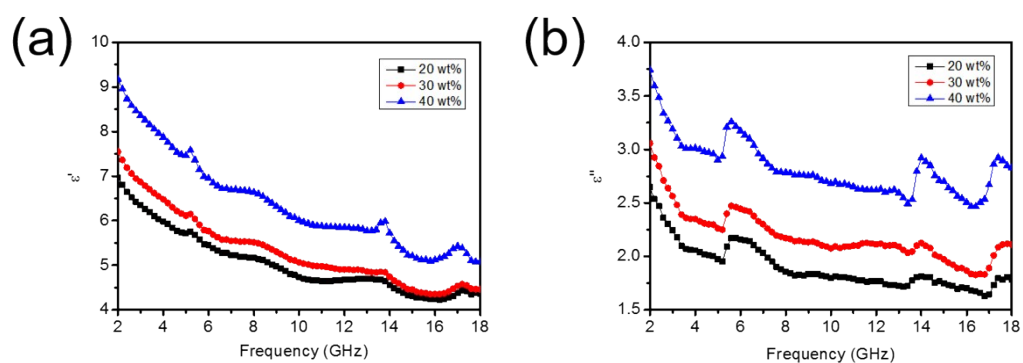

Fig. S2 Relative complex permittivity of composites loaded 20, 30 and 40

wt. % of as-prepared SiC nanowires.

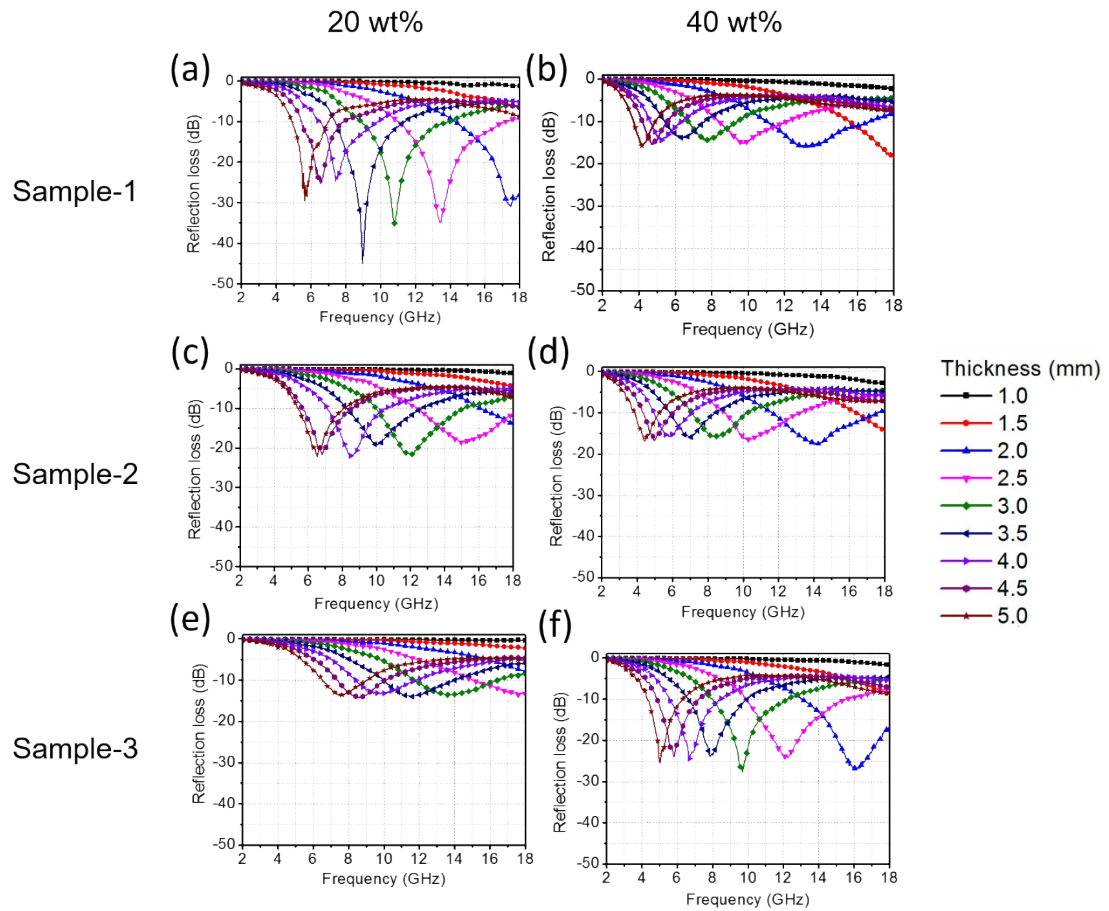

Fig. S3 RL curves of the filler loadings of sample-1 (a, b), sample-2 (c, d) and sample-3 (e, f) with 20.0 wt% and 40 wt% in wax composites with thicknesses from 1.0 to 5.0 mm in the frequency range of 2-18 GHz.
